# Supplementary material for: Enzymatically promoted release of organic molecules linked to magnetic nanoparticles
Source: publisher site journal article supplement (doi:10.3762/bjnano.9.92), 2018-03-27

# Supporting Information

for

## Enzymatically promoted release of organic molecules linked to magnetic nanoparticles

Chiara Lambruschini<sup>†1</sup>, Silvia Villa<sup>†1</sup>, Luca Banfi<sup>1</sup>, Fabio Canepa<sup>1</sup>, Fabio Morana<sup>1</sup>, Annalisa Relini<sup>1</sup>, Paola Riani<sup>\*1</sup>, Renata Riva<sup>\*1</sup> and Fulvio Silvetti<sup>1</sup>

Address: Department of Chemistry and Industrial Chemistry, Università di Genova, via  
Dodecaneso, 31 16146 Genova, Italy

Email: Paola Riani - [paola.riani@unige.it](mailto:paola.riani@unige.it); Renata Riva - [renata.riva@unige.it](mailto:renata.riva@unige.it)

\* Corresponding author

<sup>†</sup> Contributed equally to this work

**Additional experiments and NMR spectra of all new compounds**

Index:

- Diameter distribution function of NP@APTES and NP@SILICA@APTES obtained from DLS measurements
- Optimization of the coupling of **5** with a model amine
- Optimization of allyl urethane cleavage
- Calibration curve for pyrenylmethylamine
- $^1\text{H}$  and  $^{13}\text{C}$  spectra of all new compounds

## Diameter distribution function of NP@APTES and NP@SILICA@APTES

obtained from DLS measurements

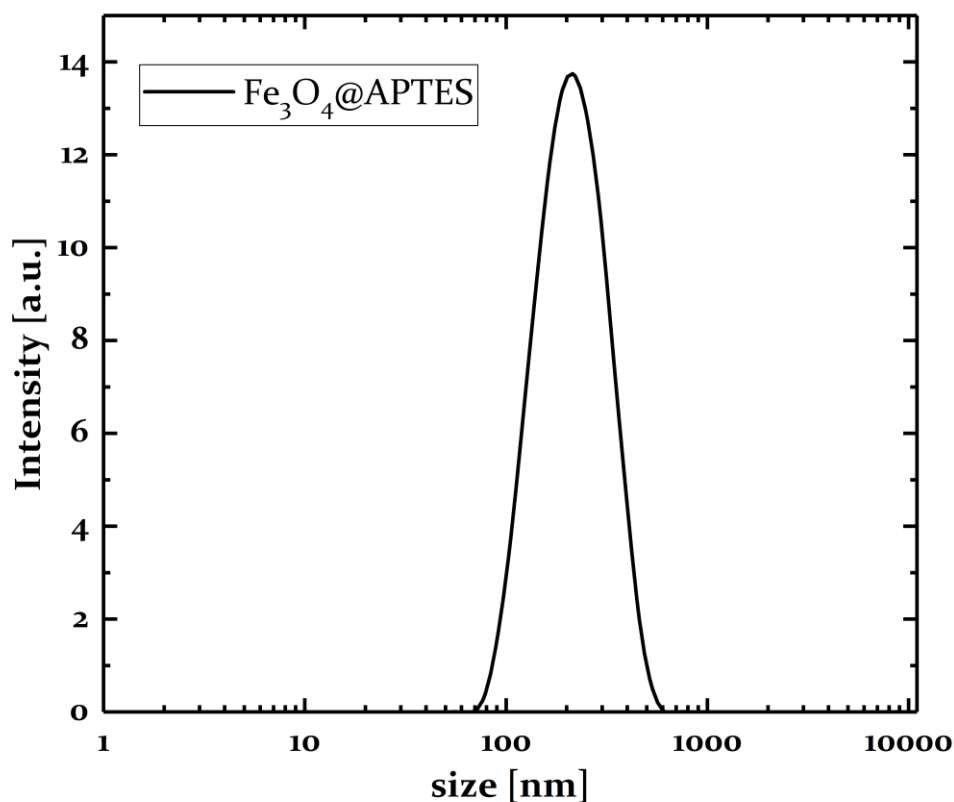

**Figure S1:** Size distribution of  $\text{Fe}_3\text{O}_4@APTES$  NPs by DLS technique.

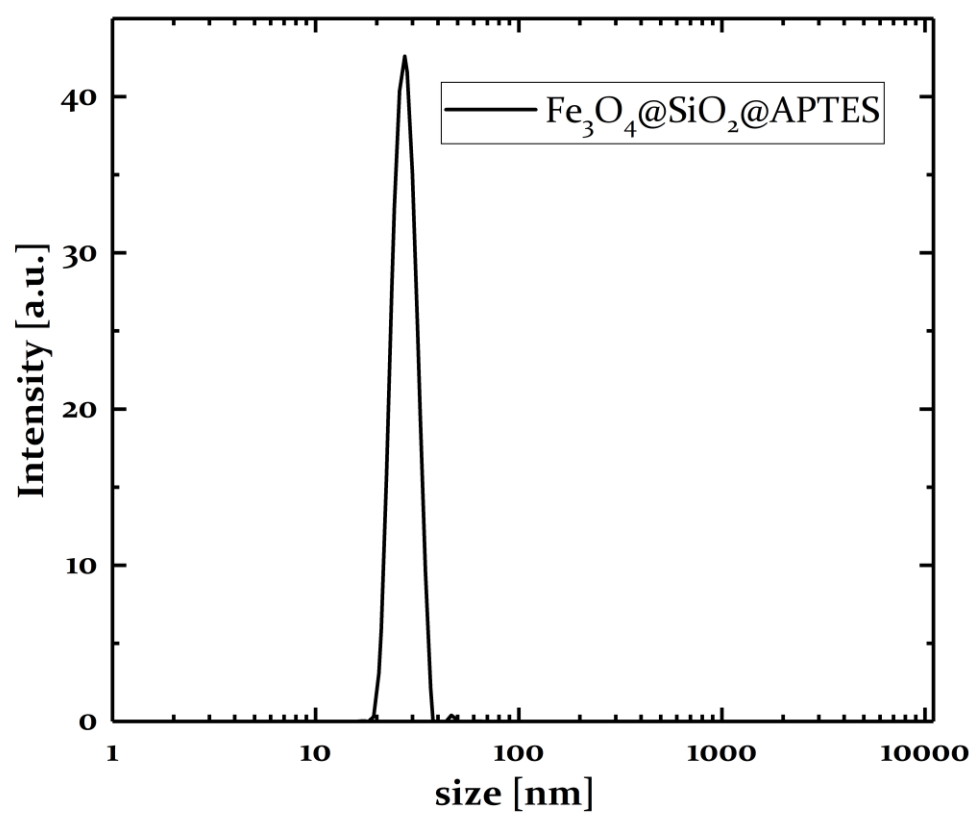

**Figure S2:** Size distribution of Fe<sub>3</sub>O<sub>4</sub>@SiO<sub>2</sub>@APTES by the DLS technique.

### Optimization of coupling of 5 with a model amine

This coupling was optimized using benzylamine as model compound. The diastereomeric ratios were determined by HPLC, and the epimer of the desired product was recognized by performing HPLC-MS analysis.

The following Table reports the obtained results. The reactions were all carried out at rt, using 1 equivalent of coupling agent and 5 equivalent of base.

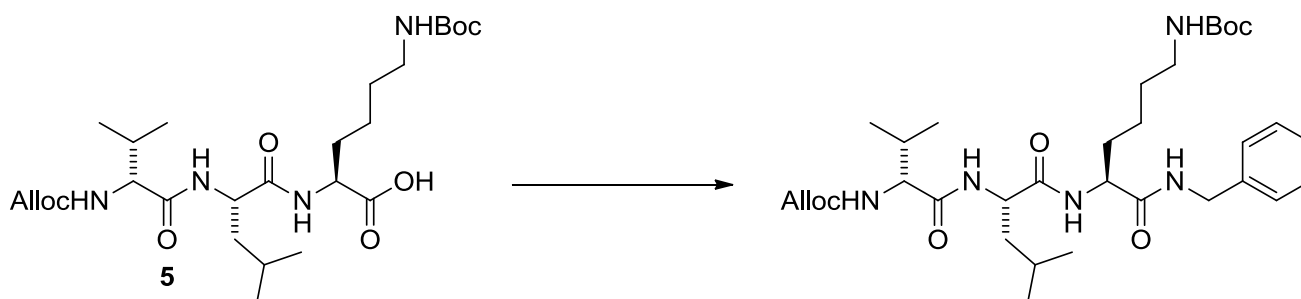

| Coupling agent | Base                  | Solvent                         | Diast. ratio |
|----------------|-----------------------|---------------------------------|--------------|
| PyBOP          | NMM                   | CH <sub>2</sub> Cl <sub>2</sub> | 67 : 33      |
| EDC-HOBT       | DIPEA                 | CH <sub>2</sub> Cl <sub>2</sub> | 69 : 31      |
| HBTU           | DIPEA                 | CH <sub>2</sub> Cl <sub>2</sub> | 90 : 10      |
| TBTU           | DIPEA                 | CH <sub>2</sub> Cl <sub>2</sub> | 92 : 8       |
| HATU           | DIPEA                 | CH <sub>2</sub> Cl <sub>2</sub> | 96 : 4       |
| HATU           | <i>sym</i> -collidine | DMF                             | 93 : 7       |
| HATU           | NMM                   | DMF                             | 95 : 5       |
| HATU           | DIPEA                 | DMF                             | 97.5 : 2.5   |

**Abbreviations:** PyBOP = (Benzotriazol-1-yl-oxytripyrrolidinophosphonium hexafluorophosphate). EDC = 1-Ethyl-3-(3-dimethylaminopropyl)carbodiimide. HBTU = 3-[Bis(dimethylamino)methylene]-3H-benzotriazol-1-oxid hexafluorophosphate. TBTU = 3-[Bis(dimethylamino)methylene]-3H-benzotriazol-1-oxid tetrafluoroborate. HOBT: 1-hydroxybenzotriazole. DIPEA: *N,N*,*N*,*N*-diisopropylethylamine (DPEA). HATU: 1-[bis(dimethylamino)methylene]-1H-1,2,3-triazolo[4,5-b]pyridinium 3-oxid hexafluorophosphate. NMM = *N*-Methylmorpholine.

## Optimization of allyl urethane cleavage

This deblocking was optimized using model compound **A**, which was prepared from **5** in 91% yield by treatment with benzylbromide and K<sub>2</sub>CO<sub>3</sub> in DMF for 1.5 h at rt.

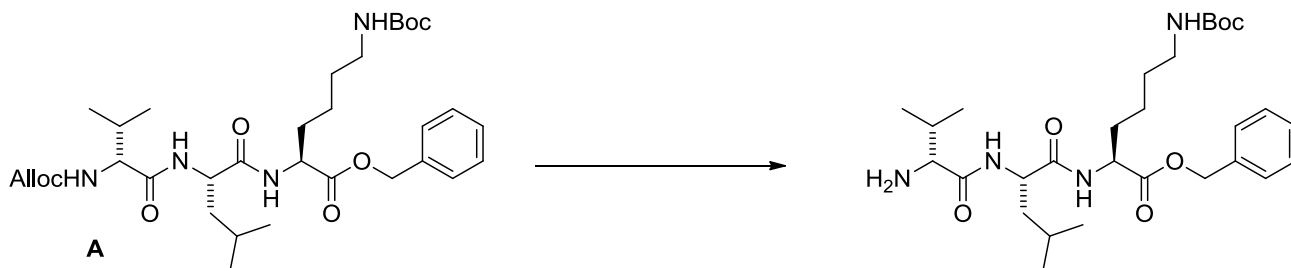

| Catalyst                                         | Scavenger                           | Other conditions                     | Yield |
|--------------------------------------------------|-------------------------------------|--------------------------------------|-------|
| Pd(PPh <sub>3</sub> ) <sub>4</sub> (0.20 equiv.) | pyrrolidine (10 equiv.)             | CH <sub>2</sub> Cl <sub>2</sub> , rt | 19%   |
| Pd(PPh <sub>3</sub> ) <sub>4</sub> (0.20 equiv.) | thioanisole (10 equiv.)             | CH <sub>2</sub> Cl <sub>2</sub> , rt | 11%   |
| Pd(PPh <sub>3</sub> ) <sub>4</sub> (0.20 equiv.) | phenylsilane (10 equiv.)            | CH <sub>2</sub> Cl <sub>2</sub> , rt | 22%   |
| Pd(PPh <sub>3</sub> ) <sub>4</sub> (0.10 equiv.) | pyrrolidine (5 equiv.)              | THF, rt                              | <10%  |
| Pd(PPh <sub>3</sub> ) <sub>4</sub> (0.10 equiv.) | phenylsilane (5 equiv.)             | THF, rt                              | 75%   |
| Pd(PPh <sub>3</sub> ) <sub>4</sub> (0.10 equiv.) | dimedone (5 equiv.)                 | THF, rt                              | 60%   |
| Pd(PPh <sub>3</sub> ) <sub>4</sub> (0.10 equiv.) | triethylammonium formate (5 equiv.) | THF, rt                              | 42%   |
| Pd(PPh <sub>3</sub> ) <sub>4</sub> (0.10 equiv.) | phenylsilane (10 equiv.)            | THF, rt                              | 90%   |

### Calibration curve for pyrenylmethylamine

The quantitative determination of 1-pyrenylmethylamine was carried out through a calibration curve, by injecting 5  $\mu\text{L}$  of solutions of known concentration.

HPLC conditions. Column: C6 Phenyl  $150 \times 3$  mm, 3  $\mu$ . Temp. = 25  $^{\circ}\text{C}$ . ( $\text{H}_2\text{O}$  + 0.1%

TFA)/ $\text{CH}_3\text{CN}$  95:5 to 41:59 in 20 min. Detection: 240 nm.  $R_t$  = 19.9.

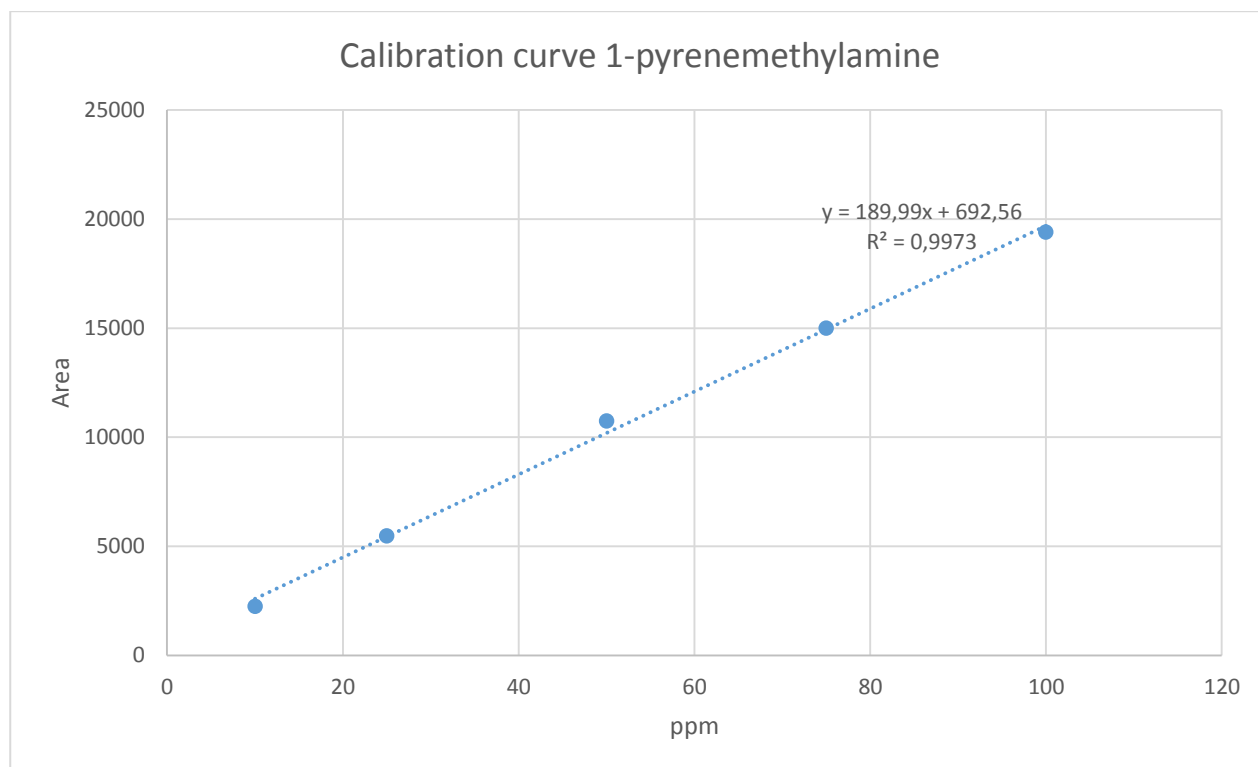

\* ppm corresponds to  $\mu\text{g}/\text{mL}$ .

Chemical structure of compound **4** is shown above the spectrum. The structure is a complex molecule featuring a central amide linkage connecting a substituted benzene ring to a substituted amine. The benzene ring is substituted with a methyl group, a methoxy group, and a propyl group. The amine is substituted with a methyl group, a methoxy group, and a propyl group. The spectrum is recorded in DMSO- $d_6$  at 25 °C, 300 MHz. The x-axis represents the chemical shift in ppm, ranging from 0 to 10. The spectrum shows several sharp peaks in the aromatic region (6.5-8.5 ppm) and a broad peak in the aliphatic region (1.0-2.5 ppm). Integration values are provided below the peaks.

Chemical structure of compound **4** is shown above the spectrum. The structure is a complex molecule featuring a central amide linkage connecting a substituted benzene ring to a substituted amine. The benzene ring is substituted with a methyl group, a methoxy group, and a propyl group. The amine is substituted with a methyl group, a methoxy group, and a propyl group. The spectrum is recorded in DMSO- $d_6$  at 25 °C, 300 MHz. The x-axis represents the chemical shift in ppm, ranging from 0 to 10. The spectrum shows several sharp peaks in the aromatic region (6.5-8.5 ppm) and a broad peak in the aliphatic region (1.0-2.5 ppm). Integration values are provided below the peaks.

Chemical structure of compound **4** is shown above the spectrum. The structure is a complex molecule featuring a central amide linkage connecting a substituted benzene ring to a substituted amine. The benzene ring is substituted with a methyl group, a methoxy group, and a propyl group. The amine is substituted with a methyl group, a methoxy group, and a propyl group. The spectrum is recorded in DMSO- $d_6$  at 25 °C, 300 MHz. The x-axis represents the chemical shift in ppm, ranging from 0 to 10. The spectrum shows several sharp peaks in the aromatic region (6.5-8.5 ppm) and a broad peak in the aliphatic region (1.0-2.5 ppm). Integration values are provided below the peaks.

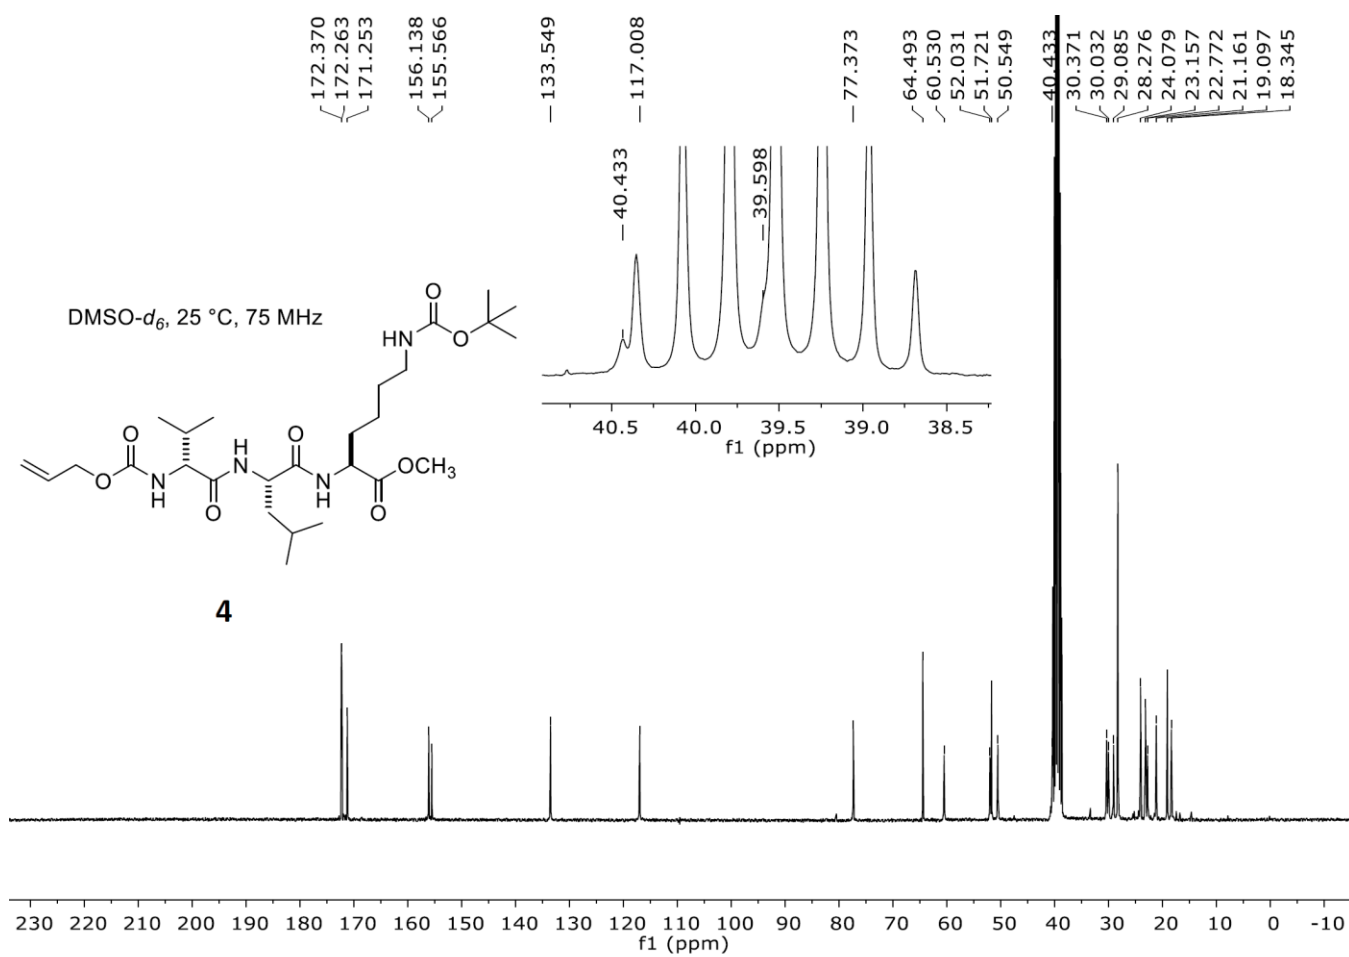



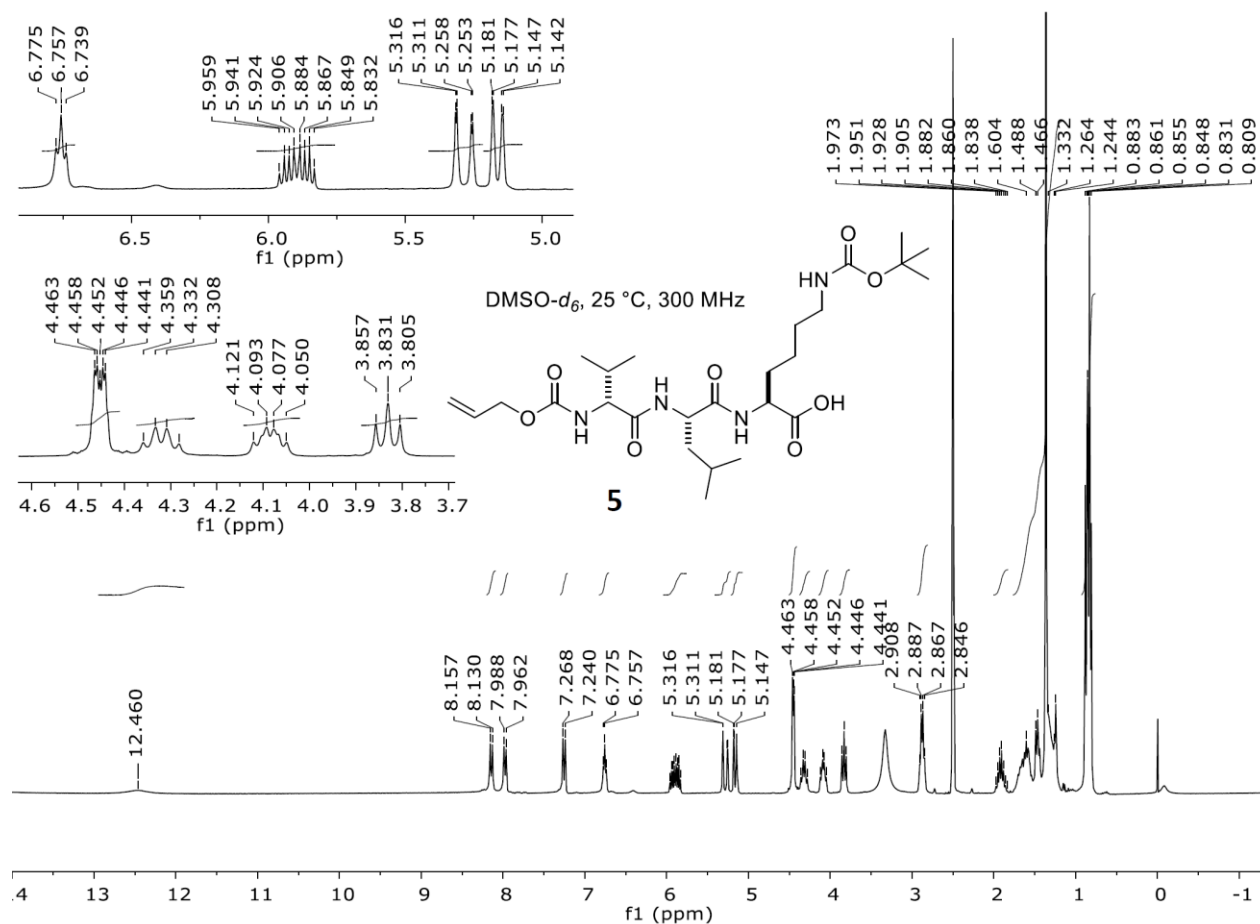

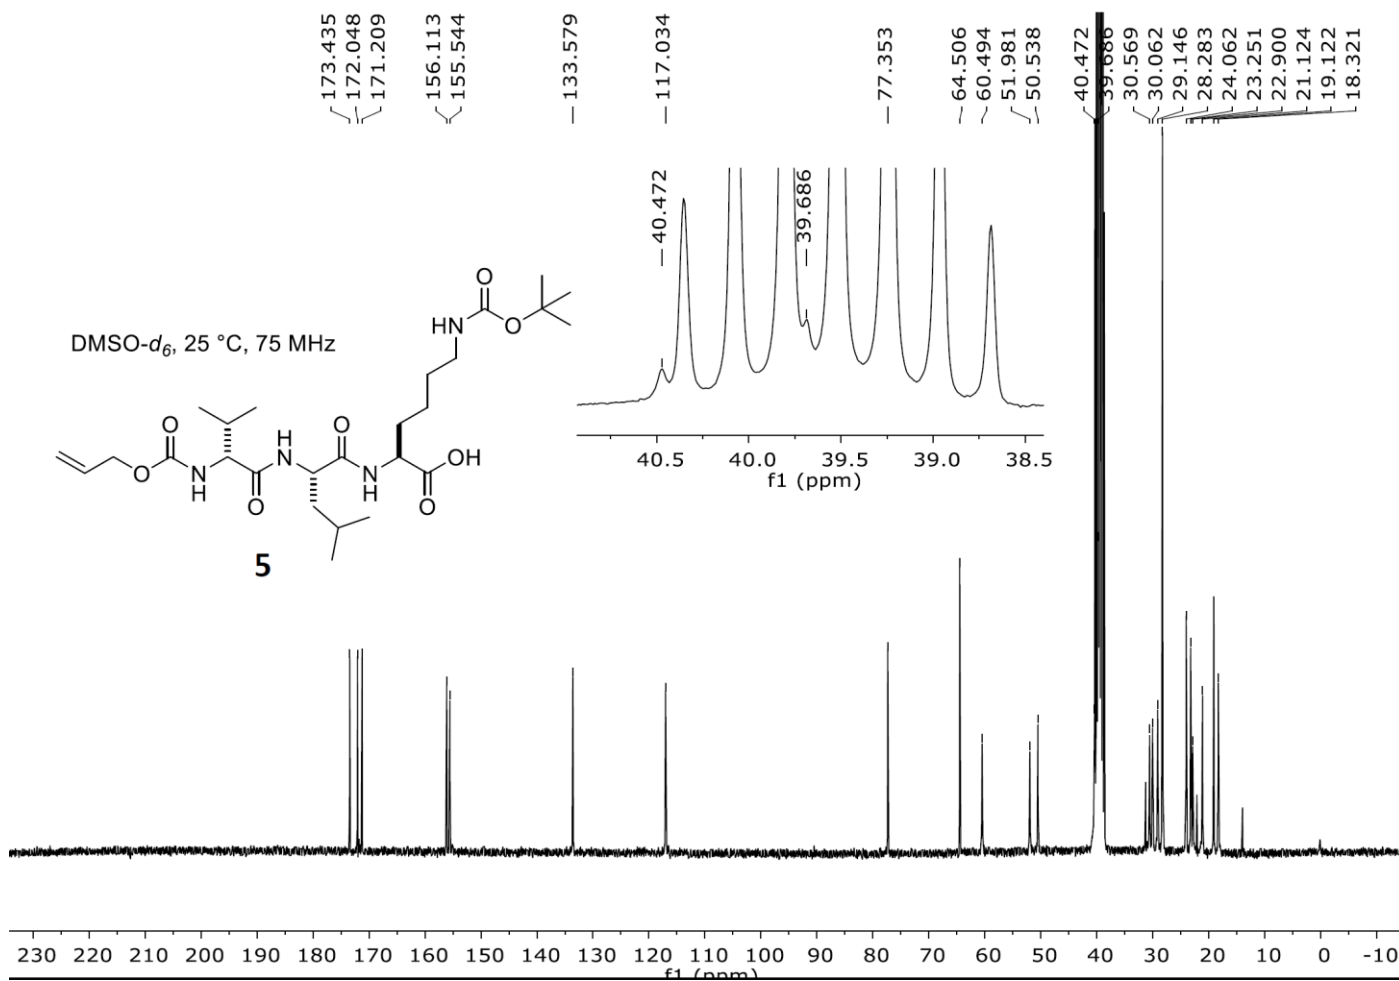

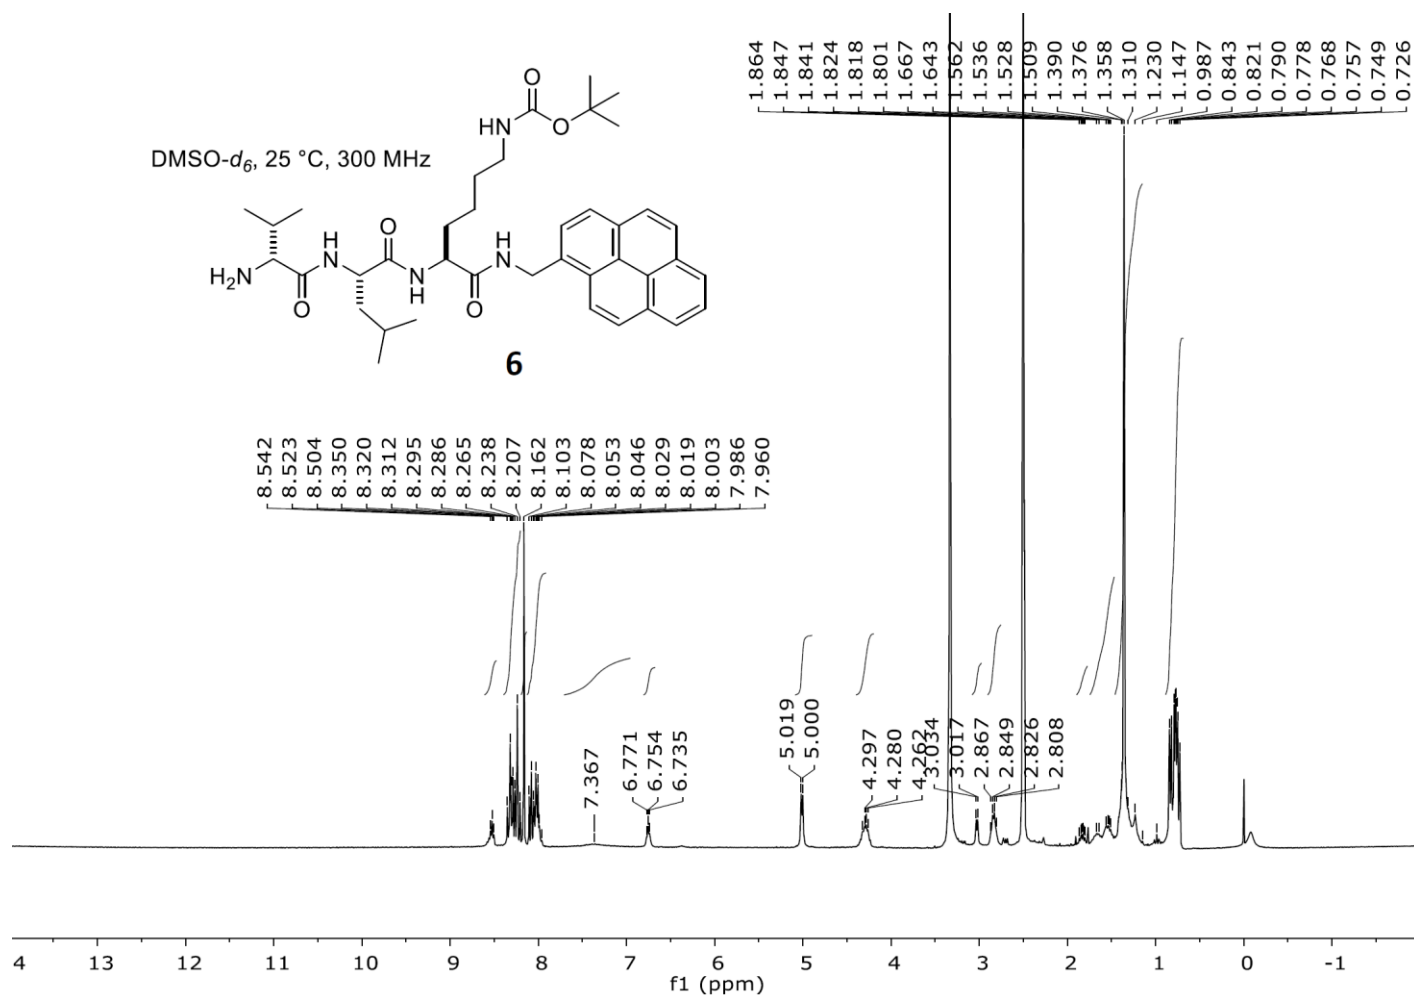

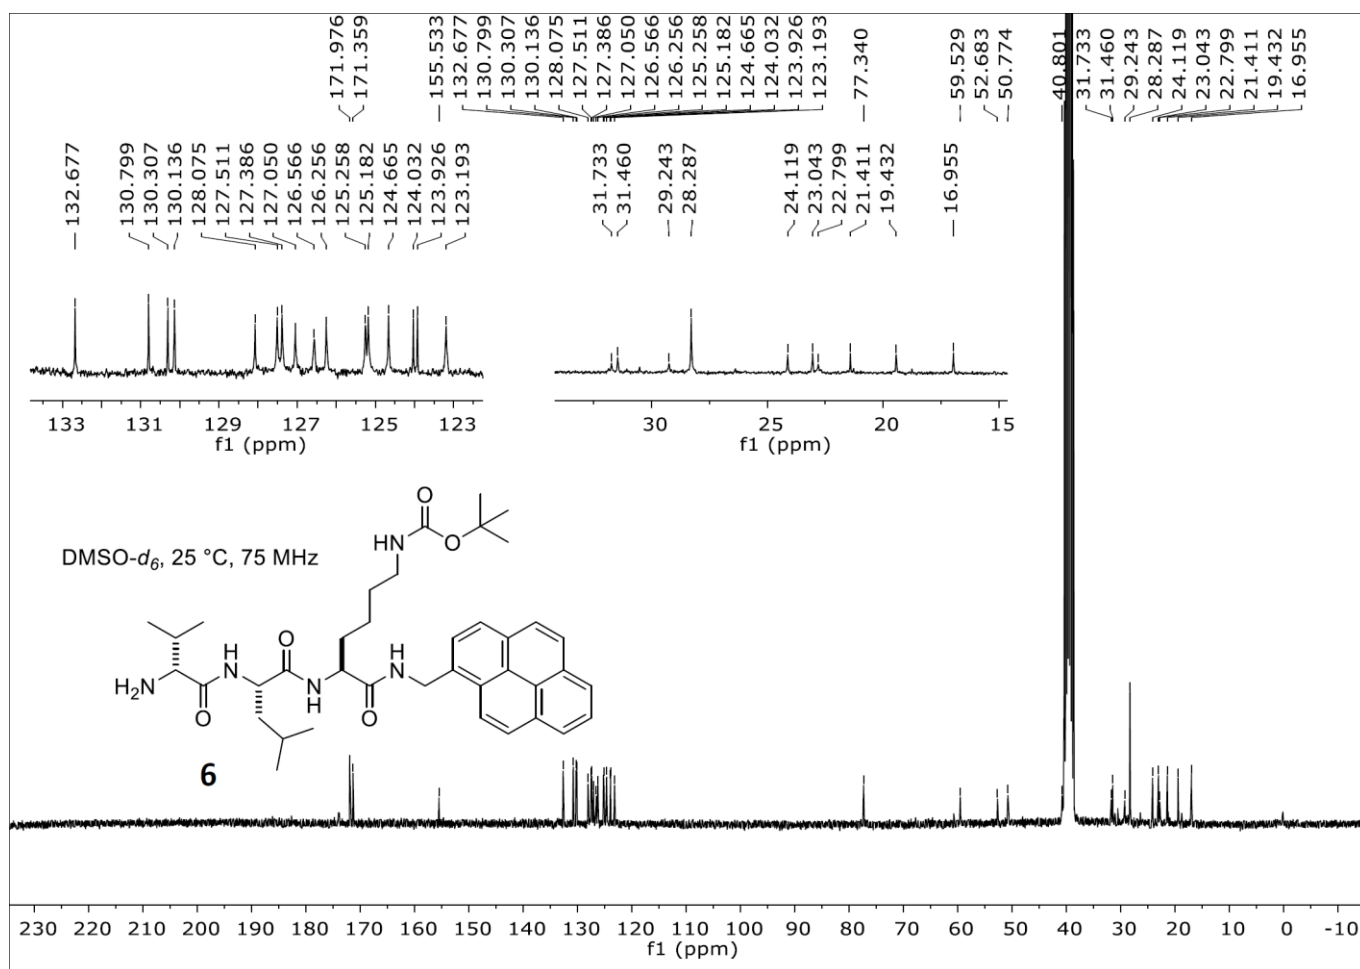

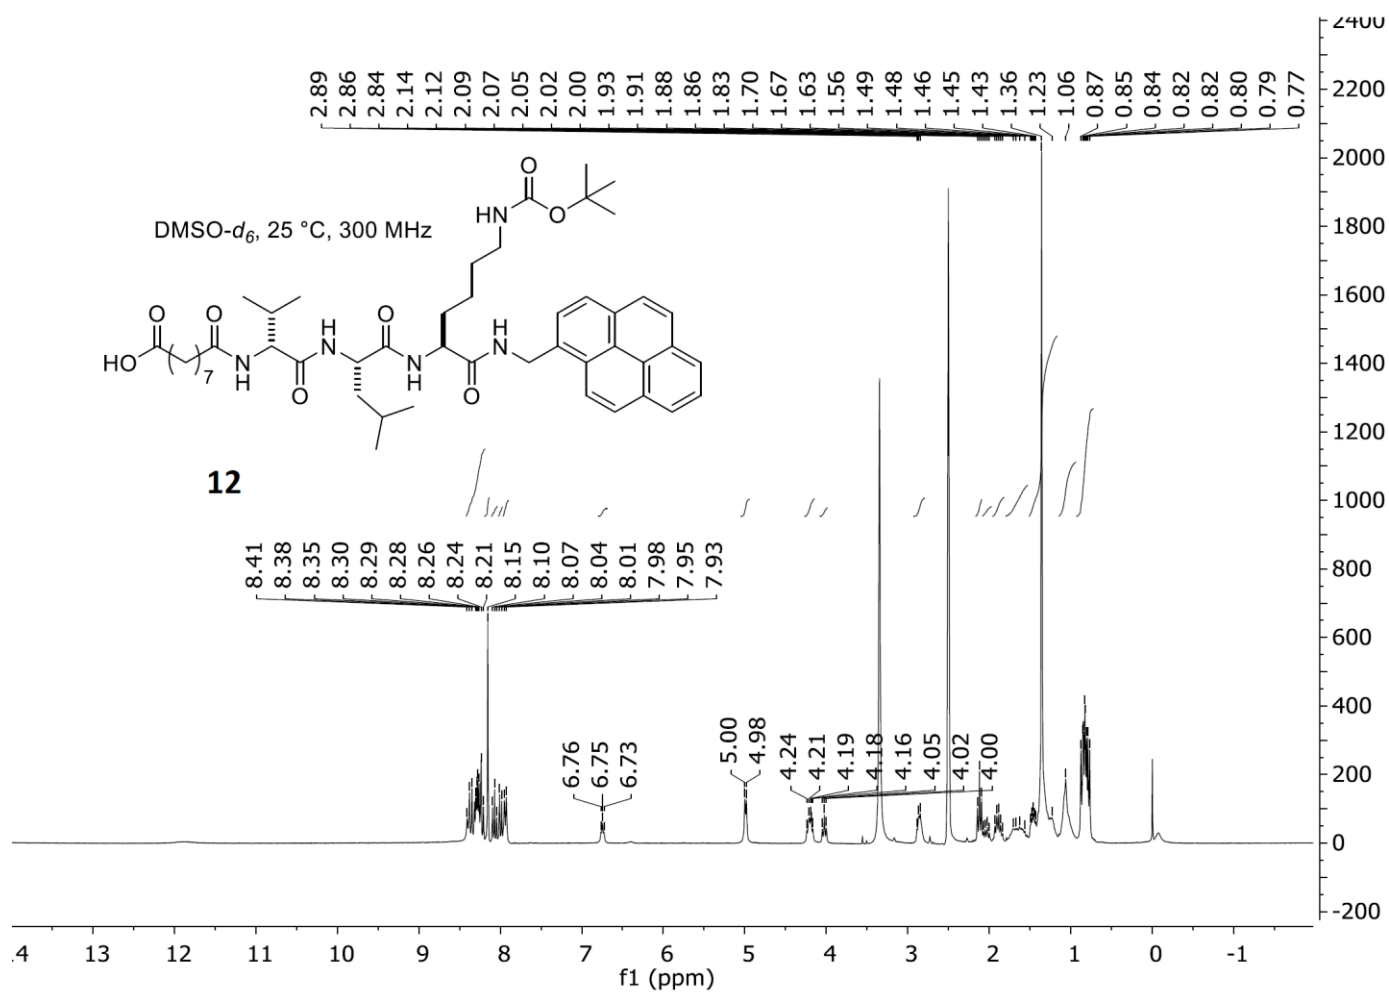

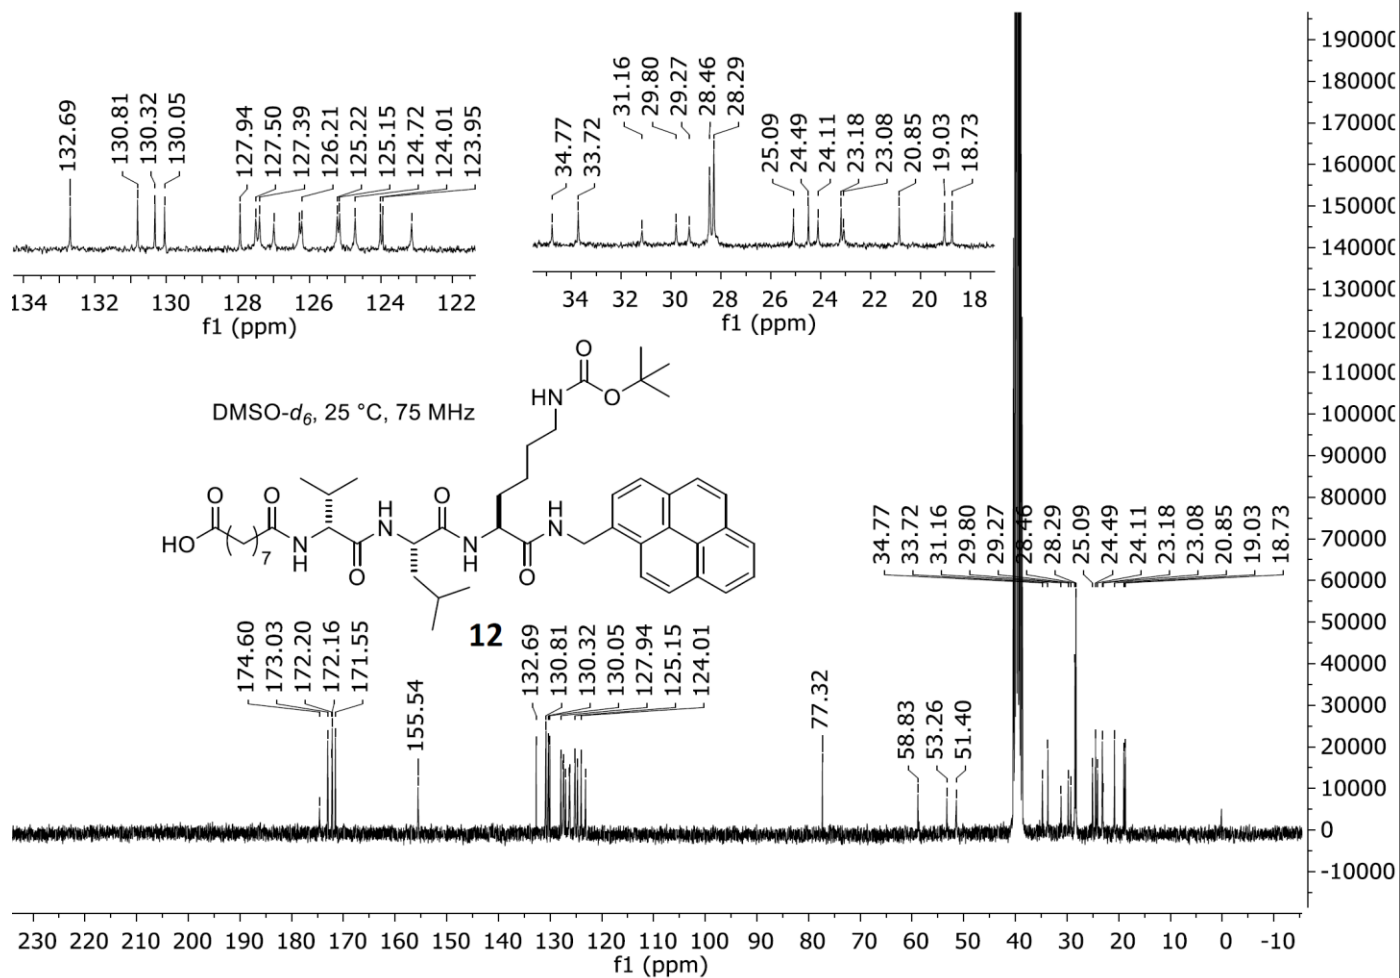

Supplement: Additional file 1 [file 2190-4286-9-92-S1.pdf]
